# Supplementary material for: EUROASPIRE IV: A European Society of Cardiology survey on the lifestyle, risk factor and therapeutic management of coronary patients from 24 European countries
Source: Oxford University Press journal article supplement (doi:10.1177/2047487315569401), 2015-02-16
Supplement: suppl-appendix.pdf [file suppl-appendix.pdf]

## Appendix EUROASPIRE IV administrative organisation, study centres and investigators

EUROASPIRE was originally an initiative of the ESC Working Group on Epidemiology and Prevention and the first EUROASPIRE survey was undertaken as part of work of the Joint ESC/EAS/ESH Implementation Group on Coronary Prevention. The structure of the administrative organisation is described below followed by a list of participating study centres and organisations, and investigators and other research personnel.

*Writing Committee:* K Kotseva, D Wood, D De Bacquer, G De Backer, L Ryden, C Jennings, V Gyberg

### *Scientific Steering/ Expert Committees:*

K Kotseva (London, UK, Chair EUROASPIRE IV Steering Committee), G De Backer (Ghent, Belgium, Chair EUROASPIRE IV Executive Committee), P Amouyel (Lille, France), J Bruthans (Prague, Czech Republic), A Castro Conde (Madrid, Spain), R Cifkova (Prague, Czech Republic), D De Bacquer (Ghent, Belgium), J De Sutter (Ghent, Belgium), J W Deckers (Rotterdam, Netherlands), M Dilic (Sarajevo, Bosnia and Herzegovina), M Dolzhenko (Kiev, Ukraine), A Erglis (Riga, Latvia), T Ferreira (Nice, France), Z Fraz (Ljubljana, Slovenia), D Gaita (Timisoara, Romania), S Gielen (Halle/Wittenberg, Germany), N Gotcheva (Sofia, Bulgaria), I Goudevenos (Ioannina, Greece), V Gyberg (Stockholm, Sweden), P Heuschmann (Würzburg, Germany), A Laucevicius (Vilnius, Lithuania), S Lehto (Kuopio, Finland), D Lovic (Nis, Serbia), M Manini (Nice, France), A P Maggioni (Florence, Italy), D Miličić (Zagreb, Croatia), D Moore (Dublin, Ireland), E Nicolaides (Nicosia, Cyprus), A Pajak (Cracow, Poland), N Pogosova (Moscow, Russia), Ž Reiner (Zagreb, Croatia), L Rydén (Stockholm, Sweden), O Schnell (Munich Neuherberg, Germany), M Stagmo (Malmo, Sweden), S Störk (Würzburg, Germany), J Sundvall (Helsinki, Finland), L Tokgözoğlu (Ankara, Turkey), J Tuomilehto (Helsinki, Finland), D Vulic (Banja Luka, Bosnia and Herzegovina), D Wood (Principal Investigator, London, UK).

*Coordinating centre:* Cardiovascular Medicine, International Centre for Circulatory Health, National Heart and Lung Institute, Medical Faculty, Imperial College London, London, UK: D A Wood, K Kotseva, C Jennings, A Adamska.

*Diabetes centre:* Department of Cardiology, Karolinska University Hospital, Stockholm, Sweden: L

Rydén, V Gyberg, J Tuomilehto, O Schnell.

*Data management centre:* EURObservational Research Programme Department, European Heart House, Sophia Antipolis, Nice, France: A Maggioni, T Ferreira, M Manini, C Taylor, M Konte, M Glemot

*Computing and statistical centre* Department of Public Health, Ghent University, Belgium: D De Bacquer, G De Backer.

*Central laboratory:* Disease Risk Unit, National Institute for Health and Welfare, Helsinki, Finland: J Sundvall, L Lund, J Leiviskä.

*Study centres, organisations, investigators and other research personnel (National Co-ordinators in each country are indicated by apteryx):*

*Belgium* University Hospital Ghent: D De Bacquer\*, G De Backer, M De Pauw, C Ghysbrecht, P Vervaet; A Z Maria Middelaers: J De Sutter\*, S Pardaens, A M Willems; A Z Sint Lucas: P Cambier, R Claeys, N Deweerdt, J Nimmegeers, H Vandekerckhove, H Verloove, L Versee.

*Bosnia and Herzegovina* Center for Medical Research and Development Health Care, Banja Luka: D Vulic \*, D Djekic. Clinical Center, Banja Luka: G Malesevic, S Pejicic, S Srdic; Clinical Center University of Sarajevo: M Dilic\*, A Begic, E Hodzic, M Kulic, N Sabanovic-Bajramovic, E Tahirovic; University Clinical Center of Tuzla: I Iveljic, J Kovcic, Z Kusljugic, M Nurkic.

*Bulgaria* National Heart Hospital, Sofia: N Gotcheva\*, V Baycheva, B Georgiev, G Vladimirov; Military Medical Academy: D Gotchev, S Ivanov.

*Croatia* University Hospital Centre Zagreb, University of Zagreb School of Medicine: Ž Reiner\*, D Miličić \*, J Samardžić; University Hospital Centre Sestre Milosrdnice, Zagreb: B Perić; University Hospital Dubrava, Zagreb: M Sičaja.

*Cyprus* Nicosia General Hospital: E Nicolaides\*, C Eftychiou, N Eteocleous, P Georgiou, C Hadjilouca, J A Moutiris, R Nicolaou, K Papadopoulos, M Patsalou.

*Czech Republic* Center for Cardiovascular Prevention, Charles University in Prague, First Faculty of Medicine and Thomayer Hospital, Prague: J Bruthans\*, R Cífková\*, A Krajcoviechova, P Wohlfahrt; Department of Internal Medicine II, Faculty of Medicine in Pilsen, Charles University, Pilsen: J Filipovský, M Krizek, Z Kviderova, O Mayer, P Vágovičová, J Vanek, J Seidlerova, K Timoracká; Department for Preventive Cardiology, Institute of Clinical and Experimental Medicine, Prague: V Adamkova, J Belohoubek, M Galovcova, V Zelenkova.

*Finland* Kuopio University Hospital: S Lehto\*, E Kiljander, P Kiljander, P Kylmaoja H R Lehto, S Olkkonen; Iisalmi Hospital: J Pennanen; Varkaus Hospital: M Herranen.

*France* Institut Pasteur de Lille, Inserm U744, Université Lille Nord de France: P Amouyel\*, A L Astolfi , S Balik, S Beauchant , J Dallongeville, C Devoghelaere , N Fievet , P Garboni, B Lemaire, N Marecaux, M Montaye ; Hopital Saint Philibert, Lomme; Hopital Cardiologique, CHRU, Lille; Centre Hospitalier Gustave Dron, Tourcoing; Hopital Victor Provo, Roubaix.

*Germany* Klinik Kitzinger Land: W Karmann, S Held. University of Würzburg: P Heuschmann\*, K Eichstädt, L Deckert , D Fischer , A Gerhardt , J Kircher, Y Memmel, K Nolte, M Schich, V Wahl, M Wagner; University Hospital Würzburg: S Störk\*, G Ertl, S Güntner, R Leyh.

*Greece* Ioannina University Hospital: J Goudevenos\*, K Kalantzi. Athens Euroclinic: D Athanassias, G Goumas, P Krimbas, D Richter, D Sakellariou; Alexandra Hospital: J Agrios, I Matthaios, E Papadopoulou, S Toumanidis, E Tsouna-Hatjis; AHEPA Hospital, Aristotle University: A Boufidou, K Makedou, L Lilis.

*Ireland* Tallaght Hospital: D Moore\*, G Broderick, N Fallon, S Storey.

*Latvia* Daugavpils Regional Hospital: I Baronenko, G Dormidontova, A Dulkevica, V Dzerve; Pauls Stradins Clinical University Hospital: A Erglis\*, T Andrejeva, N Bricina, J Jakovleva, A Jaunromane, E Keive, M Klovane, D Lurina, L Makarova, D Matisone, I Mintale, E Pahomova-Strautina, L Putane, M Stabulniece, D Vasiljevs, G Vevere, J Vilks.

*Lithuania* Vilnius University Hospital Santariskiu Klinikos: A Laucevicius\*, I Alitoit, J Badariene, I Grabliauskaite, I Jursyte, E Paleviciute, Z Petrulioniene, P Serpytis, R Serpytis, S Solovjova, V Smagriunaite; Hospital of Lithuanian Health Science University: R Babarskiene, I Ceponiene, O Gustiene, R Karaliute, E Rumbinaite, R Slapikas, V Smalinskas, R Verseckaite.

*Poland* Department of Epidemiology and Population Studies, Institute of Public Health, Jagiellonian University Medical College, Kraków: A Pająk\*, E. Brzezicka, R Łysek, W Misiowiec, R Wolfshaut-Wolak; Department of Coronary Disease, Institute of Cardiology, Jagiellonian University Medical College, John Paul II Hospital: J Nessler; Department of Cardiac and Vascular Diseases, Institute of Cardiology, Jagiellonian University, Medical College, John Paul II Hospital: P Podolec; Department of Cardiology, J. Dietl Hospital, Kraków: E Mirek-Bryniarska; Department of Cardiology, Narutowicz City Specialty Hospital, Kraków: J Grodecki; 1st Department of Cardiology and Hypertension, Jagiellonian University Medical College, Kraków: D Czarnecka, A Łukaszewska, P Jankowski; Department of Cardiology, Ludwik Rydygier Memorial Specialized Hospital, Kraków: P Bogacki.

*Romania* Universitatea de Medicina si Farmacie "V. Babes" Timisoara; Institutul de Boli Cardiovasculare Timisoara: D Gaita\*, C Avram, E Barzuca, L Gaita, F Jurca-Simina, O C Iancu, A Lazar, M Iurciuc, S Iurciuc, M Mal, S Mancas, A Mihaescu, D Mociar, S Mosteoru, S Pescariu, L Petrescu, C Sasec, A Schiller; Universitatea de Medicina si Farmacie "C. Davila" Bucuresti; Spitalul Universitar de Urgenta Bucuresti: L Amarie, A Andronic, S Calin, A Ciobanu, A Cotoban, S Guberna, L Lungeanu, D Mihalcea, N Niculescu, R Rimbas, C Udroi, D Vinereanu.

*Russia* National Research Centre for Preventive Medicine, Moscow: N Pogosova\*, A Ausheva, S Boytsov, A Kursakov, R Oganov. Moscow Regional Cardiological Centre: Y Pozdnyakov, N Skazin.

*Serbia* Clinic for internal disease InterMedica, Nis: D Lovic\*, B Lovic, M Nedeljkovic, M Ostojic; Cardiopulmonary Rehabilitation Clinical Centre Niska Banja: D Djordjevic, S Kostic, I Tasic; University Hospital Medical Center "Bezanijska Kosa", Belgrade: M Zdravkovic; Institute for Rehabilitation, Belgrad: M Anđić, T Filipović, O Ilić-Stojanović, M Ješić-Jukić, N Jevsnik, M Lazović, A Radović, D Radović, D Rosić, D Spiroski, S Stevović, T Vidaković, V Vuković-Dejanović.

*Slovenia* University Medical Centre, Division of Internal Medicine, Ljubljana: Z Fras\*, B Jug, A Juhant, A Poljancic, L Poljancic.

*Spain* Hospital la Paz - Hospital Cantoblanco, Madrid: A Castro Conde\*, R Dalmau Gonzalez-Gallarza, A M Iniesta Manjavacas.

*Sweden* Skane University Hospital, Malmo: M Stagmo\*, H Jernhed, E Stensgaard; Karolinska Hospital, Stockholm: V Gyberg\*, V Boström, C Edman Jönsson, C Hage.

*The Netherlands* Thorax Centre, ERASMUS MC, Rotterdam: J W Deckers\*, S. Khatibi F, Yongzhao; Sint Franciscus Gasthuis, Rotterdam: M. Veerhoek; Maasstadziekenhuis, Rotterdam: P C Smits; Academic Medical Centre, University of Amsterdam, Amsterdam: M Minneboo, R J G Peters, W Scholte op Reimer, M Snaterse-Zuidam.

*Turkey* Hacettepe Üniversitesi Tıp Fakültesi: L Tokgözoğlu\*, S Asil, B Kaya, D Koçyiğit; Ankara Üniversitesi Tıp Fakültesi: Ç Erol, V Kozluca, C Tulunay Kaya; İzmir Atatürk Eğitim ve Araştırma Hastanesi: İ Akyıldız, O Ergene, E Varış; Dokuz Eylül Üniversitesi Tıp Fakültesi: B Akdeniz, Ö Göldeli, Ö Kozan, E Özpelit; Dr.Siyami Ersek Hastanesi Göğüs Kalp Cerrahi Merkezi: S Altay, N Çam, M Eren; Ege Üniversitesi Tıp Fakültesi: M Kayıkçıoğlu, H Kültürsay; Florence Nightingale Hospital: V Aytekin, A Burak Çatakoğlu; Gazi Üniversitesi Tıp Fakültesi: A Abacı, M Candemir, S

Ünlü; Göztepe Eğitim Araştırma Hastanesi: A Oğuz; Gülhane Askeri Tıp Akademisi-ANKARA: C Barçın, S Yaşar, M Yokuşoğlu; Türkiye Yüksek İhtisas Hastanesi: S Aydoğdu, A Temizhan, S Ünal; İstanbul Üniversitesi Cerrahpaşa Tıp Fakültesi: H Altuğ Çakmak, M Çimci, Z Öngen; Gebze Anadolu Sağlık Merkezi: G Ateş, N Koylan; İstanbul Üniversitesi İstanbul Tıp Fakültesi: S Emet, B Umman; İstanbul Üniversitesi Kardiyoloji Enstitüsü: C Bostan, V Sansoy; İstanbul M.Akif Ersoy Kalp Eğitim ve Araştırma Hastanesi: M Kemal Erol, A Kemal Kalkan; İstanbul Kartal Koşuyolu Eğitim ve Araştırma Hastanesi: C Kaymaz, N Poçi.

*Ukraine* National Scientific Center "M.D. Strazhesko Institute Of Cardiology, MAS of Ukraine": M Dolzhenko\*, T Getman, L Konoplyanik, L Klimenko, L Lobach, Y Luchinskaya, L Lurie, M Lutay, E Mitchenko, O Nemchena, N Nosenko, N Perepelchenko, S Potashev, A Radchenko, V Romanov, V Shumakov, T Simagina Y Sirenko, O Sychov. Kiev City Heart Centre: N Mohnacheva, A Verezhnikova, O Zharinov; SI "The Institute of Gerontology named after D.F.Chebotarev NAMS of Ukraine": V Lishnevskaya, I Mikropulo, V Prihodko, I Shapovalenko.

*United Kingdom* ICCH, Imperial College London: D Wood\*, A Adamska, J Evans, K Ioannides, C Jennings, A Kasonta, K Kotseva, H Onyango, A Rapacz, B Wrotniak; Hillingdon Hospital, Middlesex: S Dubrey; Harefield Hospital, Middlesex: M Barbir; Charing Cross Hospital, London: S Connolly; Central Middlesex Hospital, London: M Dancy; Royal Brompton Hospital, London: P Collins; West Middlesex Hospital, Isleworth: R Kaprielian.
