# Supplementary material for: EUROASPIRE IV: A European Society of Cardiology survey on the lifestyle, risk factor and therapeutic management of coronary patients from 24 European countries
Source: Oxford University Press journal article supplement (doi:10.1177/2047487315569401), 2015-02-16
Supplement: suppl-table3.pdf [file suppl-table3.pdf]

**Supplementary table 1. Study population (number) enrolled from medical records and patient interviews by country, sex and age**

|                      | Number of patients |             |               |
|----------------------|--------------------|-------------|---------------|
|                      | Identified         | Interviewed | % Interviewed |
| <b>Country</b>       |                    |             |               |
| Belgium              | 1229               | 343         | 27.9%         |
| Bosnia & Herzegovina | 378                | 316         | 83.6%         |
| Bulgaria             | 361                | 120         | 33.2%         |
| Croatia              | 748                | 467         | 62.4%         |
| Cyprus               | 156                | 90          | 57.7%         |
| Czech Republic       | 652                | 490         | 75.2%         |
| Finland              | 2404               | 464         | 19.3%         |
| France               | 748                | 377         | 50.4%         |
| Germany              | 1380               | 536         | 38.8%         |
| Greece               | 94                 | 51          | 54.3%         |
| Ireland              | 365                | 201         | 55.1%         |
| Latvia               | 463                | 294         | 63.5%         |
| Lithuania            | 683                | 499         | 73.1%         |
| Netherlands          | 762                | 498         | 65.4%         |
| Poland               | 591                | 377         | 63.8%         |
| Romania              | 766                | 522         | 68.1%         |
| Russian Federation   | 746                | 424         | 56.8%         |

|                           |       |      |       |
|---------------------------|-------|------|-------|
| Serbia                    | 452   | 391  | 86.5% |
| Slovenia                  | 407   | 245  | 60.2% |
| Spain                     | 503   | 173  | 34.4% |
| Sweden                    | 562   | 359  | 63.9% |
| Turkey                    | 446   | 239  | 53.6% |
| Ukraine                   | 631   | 274  | 43.4% |
| United Kingdom            | 899   | 248  | 27.6% |
| <b>Sex</b>                |       |      |       |
| Men                       | 12068 | 6050 | 50.1% |
| Women                     | 4358  | 1948 | 44.7% |
| <b>Age at index event</b> |       |      |       |
| < 60 yrs                  | 5902  | 3043 | 51.6% |
| ≥ 60 yrs                  | 10524 | 4955 | 47.1% |
| <b>All</b>                | 16426 | 7998 | 48.7% |

**Supplementary table 2. Prevalence (%) of coronary heart disease risk factors at interview, by country, sex and age**

|                    | Current smoking <sup>1</sup> (%) | Persistent smoking <sup>2</sup> (%) | Overweight (%) <sup>3</sup> | Obesity (%) <sup>4</sup> | Abdominal overweight (%) <sup>5</sup> | Central obesity (%) <sup>6</sup> | BP ≥130/80 mmHg (%) | BP ≥140/90 mmHg (≥140/80 mmHg in diabetes) (%) | LDL-C ≥ 2.5 mmol/L (%) | LDL-C ≥ 2.0 mmol/L (%) | LDL-C ≥ 1.8 mmol/L (%) | Self-reported diabetes (%) |
|--------------------|----------------------------------|-------------------------------------|-----------------------------|--------------------------|---------------------------------------|----------------------------------|---------------------|------------------------------------------------|------------------------|------------------------|------------------------|----------------------------|
| <b>By country</b>  |                                  |                                     |                             |                          |                                       |                                  |                     |                                                |                        |                        |                        |                            |
| Belgium            | 8.2                              | 38.8                                | 79.6                        | 30.3                     | 71.8                                  | 47.9                             | 61.2                | 43.4                                           | 33.0                   | 73.6                   | 85.5                   | 23.0                       |
| Bosnia Herzegovina | 17.4                             | 33.8                                | 81.4                        | 26.6                     | 78.5                                  | 46.9                             | 89.5                | 55.7                                           | 58.2                   | 82.8                   | 88.5                   | 21.2                       |
| Bulgaria           | 19.2                             | 60.0                                | 84.2                        | 43.3                     | 78.3                                  | 56.7                             | 58.3                | 35.8                                           | 64.6                   | 85.0                   | 92.9                   | 30.8                       |
| Croatia            | 17.6                             | 55.0                                | 83.5                        | 37.1                     | 84.8                                  | 58.1                             | 72.7                | 50.6                                           | 42.9                   | 66.4                   | 79.0                   | 26.3                       |
| Cyprus             | 27.8                             | 47.1                                | 85.4                        | 41.6                     | 91.0                                  | 73.0                             | 82.2                | 52.2                                           | 38.2                   | 72.1                   | 79.4                   | 34.8                       |
| Czech Republic     | 17.6                             | 51.9                                | 85.5                        | 41.9                     | 90.0                                  | 69.1                             | 75.3                | 48.8                                           | 39.0                   | 65.3                   | 77.4                   | 36.2                       |
| Finland            | 7.5                              | 53.4                                | 78.9                        | 37.7                     | 86.0                                  | 62.1                             | 57.8                | 34.1                                           | 20.4                   | 48.8                   | 67.4                   | 24.6                       |
| France             | 25.2                             | 70.7                                | 75.5                        | 36.0                     | 73.3                                  | 54.2                             | 67.1                | 43.2                                           | 32.1                   | 60.3                   | 73.8                   | 32.1                       |
| Germany            | 11.9                             | 52.0                                | 85.3                        | 36.7                     | 84.7                                  | 62.9                             | 70.1                | 46.7                                           | 52.7                   | 78.0                   | 89.3                   | 25.4                       |
| Greece             | 19.6                             | 52.6                                | 80.4                        | 33.3                     | 83.0                                  | 59.6                             | 52.9                | 29.4                                           | 44.4                   | 66.7                   | 84.4                   | 41.2                       |
| Ireland            | 16.9                             | 50.0                                | 87.5                        | 38.5                     | 77.6                                  | 55.2                             | 48.8                | 24.9                                           | 26.9                   | 53.4                   | 65.8                   | 15.1                       |
| Latvia             | 12.2                             | 48.0                                | 84.2                        | 40.2                     | 78.7                                  | 52.6                             | 81.4                | 40.9                                           | 34.0                   | 57.4                   | 70.6                   | 20.5                       |
| Lithuania          | 18.0                             | 52.4                                | 83.4                        | 44.9                     | 83.9                                  | 61.4                             | 76.7                | 57.8                                           | 65.8                   | 88.7                   | 95.9                   | 18.6                       |
| Netherlands        | 16.3                             | 50.0                                | 76.9                        | 29.4                     | 77.7                                  | 52.7                             | 76.4                | 52.9                                           | 40.1                   | 70.2                   | 79.2                   | 20.0                       |

|                         |                   |                   |                   |                   |                   |                   |                   |                   |                   |                   |                   |                   |
|-------------------------|-------------------|-------------------|-------------------|-------------------|-------------------|-------------------|-------------------|-------------------|-------------------|-------------------|-------------------|-------------------|
| Poland                  | 20.4              | 51.8              | 81.0              | 37.2              | 77.4              | 48.3              | 73.0              | 50.0              | 39.4              | 65.3              | 78.9              | 31.4              |
| Romania                 | 11.1              | 29.7              | 84.3              | 46.0              | 90.8              | 72.0              | 47.5              | 28.2              | 38.0              | 65.3              | 79.8              | 32.8              |
| Russian Federation      | 22.6              | 64.5              | 93.1              | 50.8              | 85.6              | 63.0              | 49.1              | 25.4              | 59.7              | 80.0              | 87.4              | 20.1              |
| Serbia                  | 18.2              | 37.6              | 76.2              | 25.8              | 78.3              | 54.7              | 62.7              | 34.8              | 54.8              | 80.2              | 88.5              | 26.1              |
| Slovenia                | 9.8               | 44.4              | 87.7              | 49.4              | 91.5              | 71.5              | 73.4              | 44.7              | 25.3              | 54.1              | 69.1              | 36.9              |
| Spain                   | 11.6              | 26.8              | 79.7              | 31.4              | 83.7              | 50.6              | 66.3              | 40.7              | 19.4              | 45.9              | 59.4              | 32.9              |
| Sweden                  | 13.9              | 50.0              | 76.0              | 26.7              | 81.2              | 55.5              | 62.1              | 37.6              | 34.1              | 69.1              | 81.3              | 28.2              |
| Turkey                  | 25.5              | 53.0              | 80.9              | 40.7              | 80.0              | 48.3              | 67.2              | 41.2              | 53.7              | 83.8              | 91.7              | 36.2              |
| Ukraine                 | 13.9              | 47.4              | 81.0              | 38.0              | 73.0              | 51.1              | 72.6              | 42.7              | 60.8              | 82.3              | 88.2              | 22.6              |
| UK                      | 16.1              | 61.0              | 80.5              | 35.8              | 79.6              | 57.6              | 64.5              | 44.8              | 30.5              | 56.8              | 70.8              | 32.7              |
| MOR<br>95% CI           | 1.40<br>1.23-1.58 | 1.43<br>1.24-1.63 | 1.30<br>1.16-1.43 | 1.30<br>1.18-1.41 | 1.41<br>1.24-1.59 | 1.32<br>1.19-1.46 | 1.61<br>1.36-1.87 | 1.41<br>1.25-1.58 | 1.72<br>1.42-2.01 | 1.73<br>1.42-2.03 | 1.82<br>1.46-2.18 | 1.33<br>1.19-1.47 |
| <b>Age at interview</b> |                   |                   |                   |                   |                   |                   |                   |                   |                   |                   |                   |                   |
| < 50 yrs                | 33.6              | 52.3              | 79.5              | 39.5              | 74.8              | 51.0              | 57.3              | 26.3              | 49.5              | 71.5              | 83.3              | 14.5              |
| 50-59 yrs               | 25.2              | 49.9              | 84.5              | 41.2              | 81.7              | 59.5              | 65.3              | 38.2              | 44.2              | 72.0              | 82.8              | 22.6              |
| 60-69 yrs               | 14.7              | 47.1              | 83.1              | 39.0              | 82.6              | 58.2              | 68.0              | 44.6              | 41.4              | 68.0              | 79.4              | 29.8              |
| ≥ 70 yrs                | 5.3               | 43.2              | 79.7              | 32.3              | 83.4              | 59.3              | 70.7              | 48.7              | 39.1              | 66.9              | 79.2              | 29.9              |
|                         |                   |                   |                   |                   |                   |                   |                   |                   |                   |                   |                   |                   |
| <b>Sex</b>              |                   |                   |                   |                   |                   |                   |                   |                   |                   |                   |                   |                   |
| Men                     | 17.6              | 49.3              | 83.0              | 35.6              | 79.0              | 52.8              | 67.2              | 42.4              | 39.8              | 67.1              | 79.2              | 25.7              |
| Women                   | 11.1              | 45.4              | 79.4              | 43.8              | 91.4              | 75.2              | 67.5              | 43.8              | 48.9              | 74.5              | 84.4              | 30.1              |

|            |      |       |      |      |      |      |      |      |      |      |      |      |
|------------|------|-------|------|------|------|------|------|------|------|------|------|------|
|            |      |       |      |      |      |      |      |      |      |      |      |      |
| <b>All</b> | 16.0 | 48.6% | 82.1 | 37.6 | 82.0 | 58.2 | 67.3 | 42.7 | 42.0 | 68.9 | 80.5 | 26.8 |

<sup>1</sup>Smoking: self-reported smoking or > 10 ppm carbon monoxide in breath; <sup>2</sup>Persistent smoking: self-reported smoking or > 10 ppm carbon monoxide in breath in patients reporting to have been smoking in the month prior to the index event; <sup>3</sup>Overweight: body mass index (BMI)  $\geq$  25 kg/m<sup>2</sup>; <sup>4</sup>Obesity: BMI  $\geq$  30 kg/m<sup>2</sup>; <sup>5</sup>Abdominal overweight: waist circumference  $\geq$  80 cm for women and  $\geq$  94 cm for men; <sup>6</sup>Central obesity: waist circumference  $\geq$  88 cm for women and  $\geq$  102 cm for men

**Supplementary table 3. Therapeutic control of blood pressure, serum LDL- cholesterol and plasma glucose at interview, by country, sex and age**

|                    | Blood pressure*  |                                             | LDL-cholesterol** |                 |                 | HbA1c*** |       |
|--------------------|------------------|---------------------------------------------|-------------------|-----------------|-----------------|----------|-------|
|                    | <130/80 mmHg (%) | <140/90 mmHg (<140/80 mmHg in diabetes (%)) | <2.5 mmol/L (%)   | <2.0 mmol/L (%) | <1.8 mmol/L (%) | <6.5%    | <7.0% |
| <b>By country</b>  |                  |                                             |                   |                 |                 |          |       |
| Belgium            | 38.4             | 55.9                                        | 67.3              | 25.6            | 14.4            | 44.4     | 65.3  |
| Bosnia Herzegovina | 10.5             | 44.1                                        | 45.5              | 20.2            | 14.1            | 33.3     | 45.8  |
| Bulgaria           | 41.7             | 64.3                                        | 44.2              | 17.4            | 8.1             | 30.6     | 44.4  |
| Croatia            | 28.3             | 49.3                                        | 60.5              | 36.0            | 21.9            | 19.3     | 43.0  |
| Cyprus             | 17.6             | 45.9                                        | 62.1              | 28.8            | 21.2            | 20.8     | 45.8  |
| Czech Republic     | 24.6             | 50.7                                        | 63.9              | 36.3            | 23.4            | 30.1     | 48.3  |
| Finland            | 41.8             | 66.3                                        | 83.5              | 53.2            | 33.2            | 62.3     | 71.9  |
| France             | 33.2             | 57.0                                        | 68.7              | 40.4            | 26.8            | 25.4     | 41.2  |
| Germany            | 30.7             | 53.7                                        | 52.1              | 25.0            | 12.1            | 36.8     | 54.9  |
| Greece             | 45.6             | 69.6                                        | 56.8              | 34.1            | 15.9            | 42.1     | 63.2  |
| Ireland            | 52.3             | 76.2                                        | 74.6              | 47.5            | 34.8            | 31.0     | 51.7  |
| Latvia             | 18.0             | 58.6                                        | 68.0              | 44.4            | 30.9            | 40.7     | 55.9  |
| Lithuania          | 23.3             | 41.5                                        | 41.9              | 14.7            | 5.3             | 33.3     | 55.1  |
| Netherlands        | 24.2             | 46.6                                        | 62.6              | 30.2            | 20.9            | 30.6     | 57.6  |
| Poland             | 26.6             | 49.6                                        | 65.4              | 37.3            | 22.6)           | 51.3     | 64.1  |

|                             |                                 |                                 |                                 |                                 |                                 |                                 |                                 |
|-----------------------------|---------------------------------|---------------------------------|---------------------------------|---------------------------------|---------------------------------|---------------------------------|---------------------------------|
| Romania                     | 53.0                            | 71.5                            | 66.4                            | 37.6                            | 22.0                            | 39.0                            | 54.3                            |
| Russian Federation          | 50.4                            | 74.7                            | 49.8                            | 25.6                            | 15.9                            | 39.3                            | 53.6                            |
| Serbia                      | 37.4                            | 65.4                            | 47.4                            | 21.1                            | 12.1                            | 43.4                            | 56.6                            |
| Slovenia                    | 25.8                            | 55.0                            | 78.8                            | 49.5                            | 33.7                            | 27.0                            | 46.1                            |
| Spain                       | 33.5                            | 58.7                            | 80.4                            | 54.4                            | 40.5                            | 44.6                            | 64.3                            |
| Sweden                      | 37.8                            | 62.2                            | 70.1                            | 33.1                            | 19.9                            | 37.9                            | 56.8                            |
| Turkey                      | 32.1                            | 58.7                            | 53.4                            | 19.3                            | 10.2                            | 14.8                            | 27.2                            |
| Ukraine                     | 26.7                            | 55.0                            | 44.6                            | 21.0                            | 15.1                            | 32.1                            | 50.0                            |
| United Kingdom              | 34.8                            | 55.4                            | 75.3                            | 47.4                            | 32.0                            | 23.4                            | 37.7                            |
| <i>MOR</i><br><i>95% CI</i> | <i>1.62</i><br><i>1.36-1.87</i> | <i>1.43</i><br><i>1.25-1.60</i> | <i>1.64</i><br><i>1.37-1.90</i> | <i>1.64</i><br><i>1.37-1.91</i> | <i>1.71</i><br><i>1.40-2.02</i> | <i>1.50</i><br><i>1.26-1.74</i> | <i>1.39</i><br><i>1.19-1.58</i> |
| <b>Age at interview</b>     |                                 |                                 |                                 |                                 |                                 |                                 |                                 |
| < 50 yrs                    | 43.8                            | 73.9                            | 54.6                            | 30.9                            | 18.0                            | 33.7                            | 50.6                            |
| 50-59 yrs                   | 34.5                            | 61.4                            | 59.5                            | 30.2                            | 18.5                            | 29.6                            | 47.7                            |
| 60-69 yrs                   | 31.9                            | 55.2                            | 63.0                            | 34.6                            | 22.5                            | 36.9                            | 52.9                            |
| ≥ 70 yrs                    | 29.2                            | 51.3                            | 66.4                            | 36.2                            | 22.4                            | 37.1                            | 55.1                            |
|                             |                                 |                                 |                                 |                                 |                                 |                                 |                                 |
| <b>Sex</b>                  |                                 |                                 |                                 |                                 |                                 |                                 |                                 |
| Men                         | 32.8                            | 57.4                            | 64.7                            | 35.5                            | 22.3                            | 36.1                            | 53.8                            |
| Women                       | 32.2                            | 55.9                            | 55.4                            | 28.0                            | 17.3                            | 33.5                            | 49.2                            |
|                             |                                 |                                 |                                 |                                 |                                 |                                 |                                 |
| <b>All</b>                  | 32.7                            | 57.0                            | 62.5                            | 33.7                            | 21.1                            | 35.4                            | 52.5                            |

\* In patients on BP lowering medication: beta-blocker, calcium antagonist, ACE inhibitor, Angiotensin II- receptor blocker, diuretic or other antihypertensive drug; \*\* In patients on lipid-lowering medication; \*\*\*In patients with self-reported diabetes



**Supplementary table 4. Reported medication (%) at time of interview by country, sex and age**

|                    | Antiplatelets<br>% | Beta-blockers<br>% | ACE inhibitors/ARBs<br>% | Statins<br>% |
|--------------------|--------------------|--------------------|--------------------------|--------------|
| <b>By country</b>  |                    |                    |                          |              |
| Belgium            | 95.6               | 79.9               | 49.0                     | 94.2         |
| Bosnia Herzegovina | 97.8               | 86.7               | 85.4                     | 87.6         |
| Bulgaria           | 90.8               | 83.3               | 78.3                     | 75.0         |
| Croatia            | 96.5               | 74.9               | 79.8                     | 80.7         |
| Cyprus             | 98.9               | 80.0               | 81.1                     | 95.6         |
| Czech Republic     | 91.8               | 85.5               | 82.2                     | 93.0         |
| Finland            | 91.3               | 79.5               | 60.1                     | 81.9         |
| France             | 97.9               | 82.0               | 82.0                     | 94.2         |
| Germany            | 89.0               | 83.4               | 81.7                     | 83.2         |
| Greece             | 96.1               | 78.4               | 62.7                     | 96.1         |
| Ireland            | 98.5               | 78.6               | 73.1                     | 92.5         |
| Latvia             | 96.9               | 87.9               | 81.0                     | 93.1         |
| Lithuania          | 85.1               | 84.3               | 79.3                     | 73.5         |
| Netherlands        | 96.4               | 74.5               | 66.7                     | 86.5         |
| Poland             | 91.7               | 82.7               | 77.9                     | 81.9         |
| Romania            | 92.1               | 87.5               | 71.0                     | 87.3         |
| Russian Federation | 93.4               | 80.1               | 64.0                     | 74.6         |
| Serbia             | 98.2               | 94.1               | 86.7                     | 92.3         |
| Slovenia           | 94.3               | 86.1               | 79.1                     | 88.9         |
| Spain              | 97.1               | 89.5               | 72.1                     | 91.9         |
| Sweden             | 97.5               | 88.9               | 81.6                     | 90.0         |
| Turkey             | 95.8               | 84.0               | 75.6                     | 78.6         |
| Ukraine            | 93.4               | 77.7               | 74.0                     | 79.9         |
| United Kingdom     | 88.7               | 67.8               | 75.7                     | 84.1         |

|                         |                   |                   |                   |                   |
|-------------------------|-------------------|-------------------|-------------------|-------------------|
| MOR<br>95% CI           | 1.81<br>1.41-2.21 | 1.43<br>1.24-1.61 | 1.57<br>1.39-1.75 | 1.71<br>1.39-2.04 |
| <b>Age at interview</b> |                   |                   |                   |                   |
| < 50 yrs                | 95.9              | 82.5              | 71.2              | 87.6              |
| 50-59 yrs               | 96.3              | 83.6              | 74.6              | 86.8              |
| 60-69 yrs               | 94.0              | 84.0              | 75.3              | 85.1              |
| ≥ 70 yrs                | 90.9              | 80.1              | 76.5              | 85.0              |
|                         |                   |                   |                   |                   |
| <b>Sex</b>              |                   |                   |                   |                   |
| Men                     | 94.3              | 82.6              | 75.3              | 86.4              |
| Women                   | 92.4              | 82.5              | 74.6              | 83.5              |
|                         |                   |                   |                   |                   |
| <b>All</b>              | 93.8              | 82.6              | 75.1              | 85.7              |
